# Supplementary material for: Treatments and in-hospital mortality in acute myocardial infarction patients with rheumatoid arthritis: a nationwide retrospective cohort study in Japan
Source: Springer Nature journal article supplement (doi:10.1007/s10067-017-3555-3), 2017-01-26
Supplement: MOESM1 [file 12021180]

**Supplementary Data**

**Supplementary Table S1** Diagnoses

| Diagnosis | International Classification of Disease 10th Revision codes |
| --- | --- |
| Acute myocardial infarction | I21.x |
| Infarct site |  |
| Anterior wall | I21.0 |
| Inferior wall | I21.1 |
| Other wall* | I21.2 |
| Unspecified site | I21.3, I21.4, I21.9 |
| Prior history of myocardial infarction | I25.2 |
| Rheumatoid arthritis | M05.xx, M06.0x, M06.2x, M06.3x, M06.8x, M06.9x |
| Other rheumatic disease | M06.1x, M06.4x, M31.5, M32.x–M35.x |

*Other wall includes posterior, lateral, apical, basal, or septal wall without anterior or inferior wall involvement.

**Supplementary Table S2** Detailed PCI procedures in patients undergoing PCI on the day of admission (*n=*3659)

|  | RA group  (*n=*709) | Non-RA group  (*n=*2950) | *P* value |
| --- | --- | --- | --- |
| Intravascular ultrasound | 447 (63.0) | 1826 (61.9) | 0.605 |
| Optical coherence tomography | 12 (1.7) | 72 (2.4) | 0.265 |
| Manual thrombectomy | 492 (69.4) | 1989 (67.4) | 0.325 |
| Distal protection | 73 (10.3) | 269 (9.1) | 0.350 |
| Stent implantation | 605 (85.3) | 2508 (85.0) | 0.860 |
| Total number of stents implanted |  |  | 0.970 |
| 0 | 104 (14.7) | 442 (15.0) |  |
| 1 | 464 (65.4) | 1900 (64.4) |  |
| 2 | 110 (15.5) | 476 (16.1) |  |
| ≥3 | 31 (4.4) | 132 (4.5) |  |
| Type of stents implanted |  |  | 0.023 |
| BMS | 324 (45.7) | 1190 (40.3) |  |
| DES | 272 (38.4) | 1294 (43.9) |  |
| Both BMS and DES | 9 (1.3) | 24 (0.8) |  |
| No stenting | 104 (14.7) | 442 (15.0) |  |

Data are shown as n (%). *PCI* percutaneous coronary intervention, *RA* rheumatoid arthritis, *BMS* bare-metal stent, *DES* drug-eluting stent.

**Supplementary Figure S1** Subgroup analyses


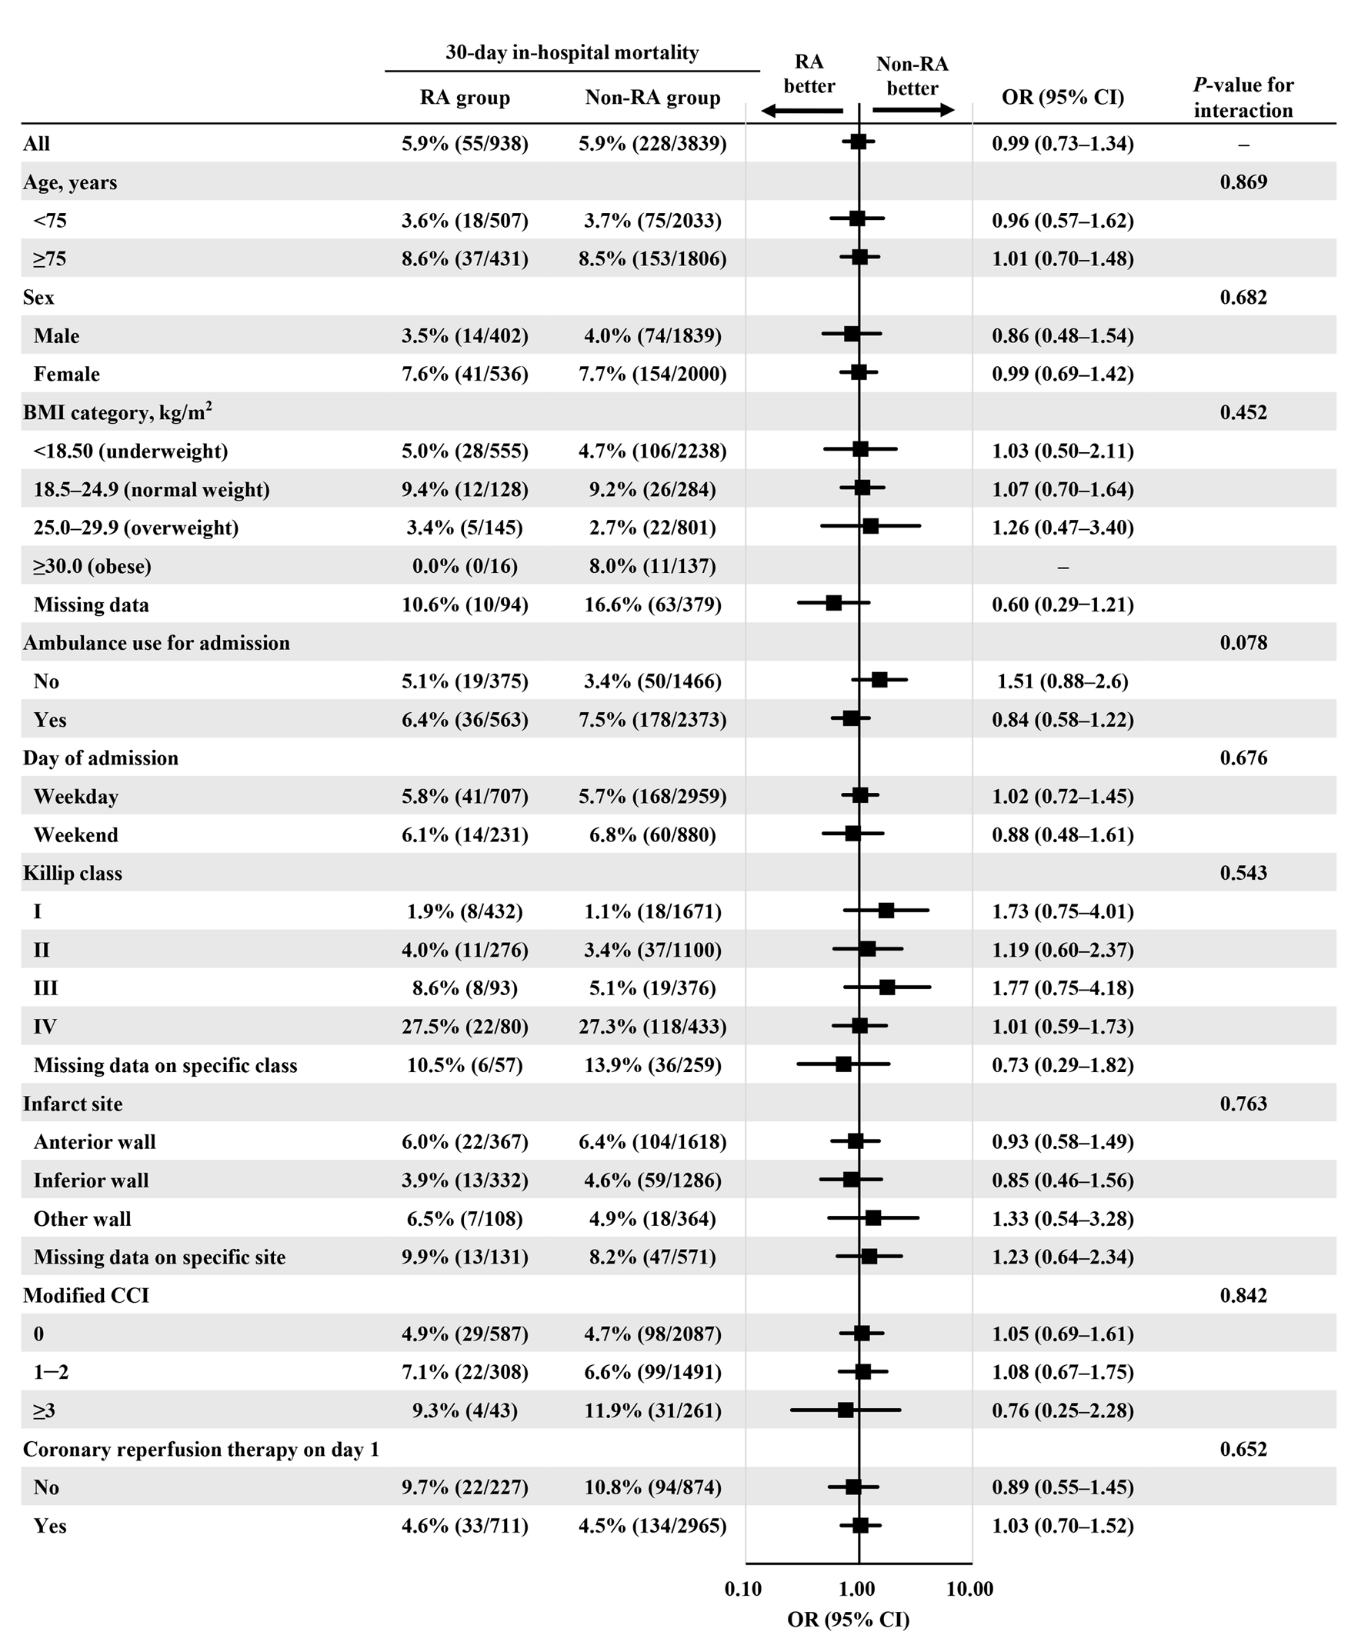


*RA* rheumatoid arthritis, *OR* odds ratio, *CI* confidence interval, *BMI* body mass index, *CCI* Charlson comorbidity index.

**Supplementary Table S3** Comparisons between male and female patients

|  | All patients (*n=*4777) | | |  | RA group (*n=*938) | | |  | Non-RA group (*n=*3839) | | |
| --- | --- | --- | --- | --- | --- | --- | --- | --- | --- | --- | --- |
|  | Males  (*n=*2241) | Females  (*n=*2536) | *P* value |  | Males  (*n=*402) | Females  (*n=*536) | *P* value |  | Males  (*n=*1839) | Females  (*n=*2000) | *P* value |
| Age, years, mean (SD) | 69.7 (9.5) | 76.0 (8.2) | <0.001 |  | 70.1 (9.7) | 75.4 (8.5) | <0.001 |  | 69.6 (9.5) | 76.2 (8.0) | <0.001 |
| BMI category, kg/m2 |  |  | <0.001 |  |  |  | <0.001 |  |  |  | <0.001 |
| <18.5 (underweight) | 1361 (60.7) | 1432 (56.5) |  |  | 263 (65.4) | 292 (54.5) |  |  | 1098 (59.7) | 1140 (57.0) |  |
| 18.5–24.9 (normal weight) | 102 (4.6) | 310 (12.2) |  |  | 30 (7.5) | 98 (18.3) |  |  | 72 (3.9) | 212 (10.6) |  |
| 25.0–29.9 (overweight) | 545 (24.3) | 401 (15.8) |  |  | 77 (19.2) | 68 (12.7) |  |  | 468 (25.4) | 333 (16.7) |  |
| ≥30.0 (obese) | 61 (2.7) | 92 (3.6) |  |  | 8 (2.0) | 8 (1.5) |  |  | 53 (2.9) | 84 (4.2) |  |
| Missing data | 172 (7.7) | 301 (11.9) |  |  | 24 (6.0) | 70 (13.1) |  |  | 148 (8.0) | 231 (11.6) |  |
| Ambulance use for admission | 1349 (60.2) | 1587 (62.6) | 0.095 |  | 230 (57.2) | 333 (62.1) | 0.139 |  | 1119 (60.8) | 1254 (62.7) | 0.245 |
| Weekend admission | 498 (22.2) | 613 (24.2) | 0.115 |  | 91 (22.6) | 140 (26.1) | 0.251 |  | 407 (22.1) | 473 (23.7) | 0.265 |
| Killip class at admission |  |  | 0.017 |  |  |  | 0.450 |  |  |  | 0.045 |
| I | 1033 (46.1) | 1070 (42.2) |  |  | 197 (49.0) | 235 (43.8) |  |  | 836 (45.5) | 835 (41.8) |  |
| II | 644 (28.7) | 732 (28.9) |  |  | 118 (29.4) | 158 (29.5) |  |  | 526 (28.6) | 574 (28.7) |  |
| III | 195 (8.7) | 274 (10.8) |  |  | 36 (9.0) | 57 (10.6) |  |  | 159 (8.6) | 217 (10.9) |  |
| IV | 223 (10.0) | 290 (11.4) |  |  | 30 (7.5) | 50 (9.3) |  |  | 193 (10.5) | 240 (12.0) |  |
| Missing data on specific class | 146 (6.5) | 170 (6.7) |  |  | 21 (5.2) | 36 (6.7) |  |  | 125 (6.8) | 134 (6.7) |  |
| Infarct site |  |  | 0.393 |  |  |  | 0.047 |  |  |  | 0.761 |
| Anterior wall | 912 (40.7) | 1073 (42.3) |  |  | 152 (37.8) | 215 (40.1) |  |  | 760 (41.3) | 858 (42.9) |  |
| Inferior wall | 766 (34.2) | 852 (33.6) |  |  | 137 (34.1) | 195 (36.4) |  |  | 629 (34.2) | 657 (32.9) |  |
| Other wall | 237 (10.6) | 235 (9.3) |  |  | 60 (14.9) | 48 (9.0) |  |  | 177 (9.6) | 187 (9.4) |  |
| Missing data on specific site | 326 (14.5) | 376 (14.8) |  |  | 53 (13.2) | 78 (14.6) |  |  | 273 (14.8) | 298 (14.9) |  |
| Modified CCI |  |  | 0.021 |  |  |  | 0.367 |  |  |  | 0.006 |
| 0 | 1301 (58.1) | 1373 (54.1) |  |  | 252 (62.7) | 335 (62.5) |  |  | 1049 (57.0) | 1038 (51.9) |  |
| 1–2 | 809 (36.1) | 990 (39.0) |  |  | 136 (33.8) | 172 (32.1) |  |  | 673 (36.6) | 818 (40.9) |  |
| ≥3 | 131 (5.8) | 173 (6.8) |  |  | 14 (3.5) | 29 (5.4) |  |  | 117 (6.4) | 144 (7.2) |  |
| Coronary reperfusion therapy on day 1 | 1813 (80.9) | 1863 (73.5) | <0.001 |  | 318 (79.1) | 393 (73.3) | 0.045 |  | 1495 (81.3) | 1470 (73.5) | <0.001 |
| PCI | 1802 (80.4) | 1857 (73.2) | <0.001 |  | 317 (78.9) | 392 (73.1) | 0.046 |  | 1485 (80.8) | 1465 (73.3) | <0.001 |
| CABG | 15 (0.7) | 10 (0.4) | 0.229 |  | 2 (0.5) | 2 (0.4) | 1.000 |  | 13 (0.7) | 8 (0.4) | 0.273 |
| Thrombolysis | 19 (0.8) | 20 (0.8) | 0.873 |  | 5 (1.2) | 2 (0.4) | 0.145 |  | 14 (0.8) | 18 (0.9) | 0.724 |
| Coronary angiography during hospitalization | 2145 (95.7) | 2304 (90.9) | <0.001 |  | 388 (96.5) | 485 (90.5) | <0.001 |  | 1757 (95.5) | 1819 (91.0) | <0.001 |
| Coronary reperfusion therapy during hospitalization | 2057 (91.8) | 2110 (83.2) | <0.001 |  | 375 (93.3) | 442 (82.5) | <0.001 |  | 1682 (91.5) | 1668 (83.4) | <0.001 |
| PCI | 2026 (90.4) | 2089 (82.4) | <0.001 |  | 373 (92.8) | 439 (81.9) | <0.001 |  | 1653 (89.9) | 1650 (82.5) | <0.001 |
| CABG | 47 (2.1) | 36 (1.4) | 0.077 |  | 3 (0.7) | 7 (1.3) | 0.529 |  | 44 (2.4) | 29 (1.5) | 0.034 |
| Thrombolysis | 24 (1.1) | 25 (1.0) | 0.776 |  | 6 (1.5) | 2 (0.4) | 0.080 |  | 18 (1.0) | 23 (1.2) | 0.640 |
| Day of coronary reperfusion therapy |  |  | <0.001 |  |  |  | <0.001 |  |  |  | <0.001 |
| Day 1 | 1813 (80.9) | 1863 (73.5) |  |  | 318 (79.1) | 393 (73.3) |  |  | 1495 (81.3) | 1470 (73.5) |  |
| Day 2 | 92 (4.1) | 98 (3.9) |  |  | 25 (6.2) | 21 (3.9) |  |  | 67 (3.6) | 77 (3.9) |  |
| Day 3 or later | 152 (6.8) | 149 (5.9) |  |  | 32 (8.0) | 28 (5.2) |  |  | 120 (6.5) | 121 (6.1) |  |
| Not performed | 184 (8.2) | 426 (16.8) |  |  | 27 (6.7) | 94 (17.5) |  |  | 157 (8.5) | 332 (16.6) |  |
| Mechanical support during hospitalization |  |  |  |  |  |  |  |  |  |  |  |
| IABP | 340 (15.2) | 354 (14.0) | 0.249 |  | 51 (12.7) | 71 (13.2) | 0.845 |  | 289 (15.7) | 283 (14.2) | 0.188 |
| ECMO | 42 (1.9) | 34 (1.3) | 0.164 |  | 1 (0.2) | 6 (1.1) | 0.249 |  | 41 (2.2) | 28 (1.4) | 0.067 |
| Temporary pacing | 98 (4.4) | 126 (5.0) | 0.338 |  | 15 (3.7) | 28 (5.2) | 0.344 |  | 83 (4.5) | 98 (4.9) | 0.594 |
| Mechanical ventilation | 302 (13.5) | 405 (16.0) | 0.016 |  | 43 (10.7) | 75 (14.0) | 0.137 |  | 259 (14.1) | 330 (16.5) | 0.039 |
| Intermittent hemodialysis | 54 (2.4) | 79 (3.1) | 0.158 |  | 10 (2.5) | 7 (1.3) | 0.219 |  | 44 (2.4) | 72 (3.6) | 0.030 |
| Continuous hemodiafiltration | 59 (2.6) | 68 (2.7) | 0.928 |  | 6 (1.5) | 6 (1.1) | 0.771 |  | 53 (2.9) | 62 (3.1) | 0.706 |
| Blood transfusion during hospitalization |  |  |  |  |  |  |  |  |  |  |  |
| Red blood cells | 209 (9.3) | 424 (16.7) | <0.001 |  | 36 (9.0) | 113 (21.1) | <0.001 |  | 173 (9.4) | 311 (15.6) | <0.001 |
| Fresh-frozen plasma | 85 (3.8) | 93 (3.7) | 0.819 |  | 8 (2.0) | 23 (4.3) | 0.064 |  | 77 (4.2) | 70 (3.5) | 0.275 |
| Platelets | 60 (2.7) | 86 (3.4) | 0.178 |  | 3 (0.7) | 16 (3.0) | 0.018 |  | 57 (3.1) | 70 (3.5) | 0.528 |
| Drugs used during hospitalization |  |  |  |  |  |  |  |  |  |  |  |
| Aspirin | 1961 (87.5) | 2137 (84.3) | 0.001 |  | 360 (89.6) | 447 (83.4) | 0.008 |  | 1601 (87.1) | 1690 (84.5) | 0.024 |
| Clopidogrel/ticlopidine | 1948 (86.9) | 2067 (81.5) | <0.001 |  | 358 (89.1) | 429 (80.0) | <0.001 |  | 1590 (86.5) | 1638 (81.9) | <0.001 |
| β-blocker | 1286 (57.4) | 1343 (53.0) | 0.002 |  | 220 (54.7) | 278 (51.9) | 0.391 |  | 1066 (58.0) | 1065 (53.3) | 0.003 |
| ACE-I/ARB | 1583 (70.6) | 1706 (67.3) | 0.012 |  | 269 (66.9) | 322 (60.1) | 0.034 |  | 1314 (71.5) | 1384 (69.2) | 0.129 |
| Statin | 1681 (75.0) | 1766 (69.6) | <0.001 |  | 301 (74.9) | 338 (63.1) | <0.001 |  | 1380 (75.0) | 1428 (71.4) | 0.012 |
| Outcomes |  |  |  |  |  |  |  |  |  |  |  |
| 30-day in-hospital mortality | 88 (3.9) | 195 (7.7) | <0.001 |  | 14 (3.5) | 41 (7.6) | 0.007 |  | 74 (4.0) | 154 (7.7) | <0.001 |
| 7-day in-hospital mortality | 48 (2.1) | 123 (4.9) | <0.001 |  | 6 (1.5) | 29 (5.4) | 0.001 |  | 42 (2.3) | 94 (4.7) | <0.001 |
| Overall in-hospital mortality | 111 (5.0) | 234 (9.2) | <0.001 |  | 18 (4.5) | 51 (9.5) | 0.003 |  | 93 (5.1) | 183 (9.2) | <0.001 |

Data are shown as *n* (%), unless otherwise stated. *RA* rheumatoid arthritis, *SD* standard deviation, *BMI* body mass index, *CCI* Charlson comorbidity index, *PCI* percutaneous coronary intervention, *CABG* coronary artery bypass graft, *IABP* intra-aortic balloon pumping, *ECMO* extracorporeal membrane oxygenation, *ACE-I* angiotensin-converting enzyme inhibitor, *ARB* angiotensin II receptor blocker.
